# Supplementary material
Source: PubMed Central journal article supplement (PMC7610537)
Supplement: EMS120501-supplement-Appendix.pdf [file EMS120501-supplement-Appendix.pdf]

## Appendix A: $\text{CH}_3\text{CO}^+$ in other sources

The acetyl cation,  $\text{CH}_3\text{CO}^+$ , has also been detected towards L483, L1544, and L1527 (see Fig. A.1). However, it is not observed towards Sgr B2 (PRIMOS<sup>3</sup> line survey; Neill et al. 2012), towards Orion-KL (Tercero et al. 2010, 2011), or in our line survey of B1 (Marcelino et al. 2007, 2009, 2010; Cernicharo 2012). In the PRIMOS data on SgrB2, a very tentative detection of the  $J=1-0$   $K=0$  line could be claimed at a velocity of  $80 \text{ km s}^{-1}$ . However, only an upper limit can be obtained for the  $J=2-1$  transition as this line is heavily blended with a strong line of acetone. It seems, hence, that  $\text{CH}_3\text{CO}^+$  is typical of cold interstellar clouds.

## Appendix B: Potential carriers of the series of lines

All known diatomic species in cold dark clouds have overly large rotational constants compared with those derived from the lines in TMC-1. For example, a molecule containing one S (CS, NS, SO) will have a rotational constant that is too high by more than 12 GHz. Adding one or two H atoms to these combinations of sulphur produces radicals (with overly high rotational constants, such as HCS) or asymmetric rotors such as  $\text{H}_2\text{CS}$ , which is too heavy (Müller et al. 2019). A molecule with two S atoms is, of course, too heavy (for example,  $B(\text{S}_2)=8831 \text{ MHz}$ ; Pickett 1979), and we do not expect to have Si- or P-bearing polyatomic species in this cloud. The first step in finding candidates is to exclude the possibility of having a slightly asymmetric species. In that case, we could expect to have lines corresponding to  $K=\pm 1$  at roughly  $\pm(B-C)$  from the  $K=0$  lines. We searched in the Q-band survey ( $J=2-1$ ) for such a pattern. No lines up to one-fourth of the intensity of the  $K=0$  line are observed. Moreover, taking into account that there is no evidence for a radical as a possible carrier, the species resulting from the addition of one hydrogen to the closed-shell asymmetric species HNCO, HCOOH, and  $\text{H}_2\text{CCC}$  have to be excluded. However, their protonated species are also, at least in principle, closed-shell species. Hence, possible candidates are  $\text{H}_2\text{CCCH}^+$ ,  $\text{CH}_3\text{CCH}_2^+$ ,  $\text{HCNOH}^+$ ,  $\text{HNCOH}^+$ ,  $\text{HCOOH}_2^+$ , and  $\text{CH}_3\text{OO}^+$ , all of which, with the exception of the last one, are protonated forms of known neutral and abundant species in TMC-1. Nevertheless, the resulting molecular structures will be highly asymmetric for most of them, or they are too light or too heavy, as are the cases for  $\text{H}_2\text{CCCH}^+$  and  $\text{CH}_3\text{CCH}_2^+$ , respectively.  $\text{HNCOH}^+$  is a linear species characterized in the laboratory with a rotational constant of 9955 MHz (Latanzi et al. 2012) and is not detected in our data. Other exotic species, such as  $\text{NH}_2\text{CHOH}^+$ ,  $\text{CH}_2\text{ONH}_2^+$ , and  $\text{CH}_3\text{NOH}^+$ , which could result from the protonation of interesting molecules ( $\text{NH}_2\text{CHO}$  for example), are discarded for their molecular asymmetry and because the neutral species have not been observed in TMC-1. Ab initio calculations have been performed for the most promising candidates (see Table B.1), and their isomers and the results are discussed in Sect. 3.1.

## Appendix C: Additional quantum chemical calculations for $\text{CH}_3\text{CO}^+$

The potential energy surface (PES) for the protonation of ketene has been explored at the CCSD/cc-pVTZ level of theory. In the

<sup>3</sup> Access to the entire PRIMOS data set, specifics on the observing strategy, and overall frequency coverage information is available at <http://www.cv.nrao.edu/~aremijan/PRIMOS/>

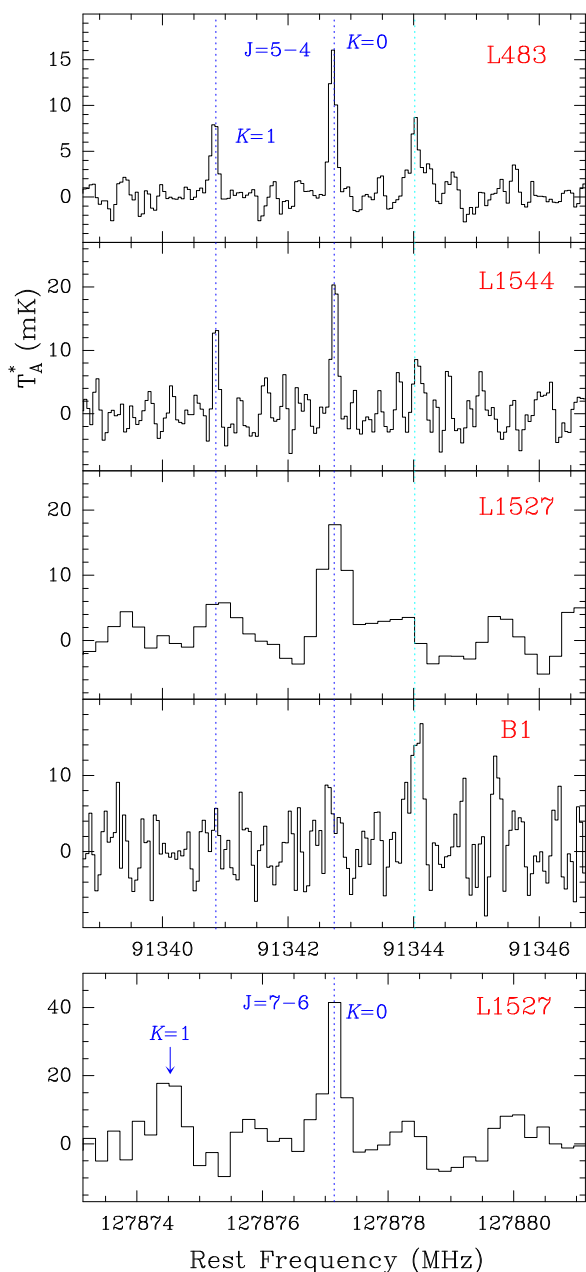

**Fig. A.1.** Observations of the  $J=5-4$  transition of  $\text{CH}_3\text{CO}^+$  towards L483, L1544, L1527, and B1 (top panels); the bottom panel shows the  $J=7-6$  line towards L1527. The abscissa corresponds to the rest frequency (in MHz) and the ordinate is the antenna temperature (in mK). The spectral resolution is 48.8 kHz for all sources except L1527, for which it is 198 kHz. The vertical dashed blue lines indicate the position of the  $K=0$  and  $K=1$  lines (detected in all sources except B1), and the cyan line corresponds to the U feature at 91344 MHz (detected in all sources except L1527). The rest velocities of L1527 and L1544 were taken as  $v_{LSR} = 5.9 \text{ km/s}$  and  $7.2 \text{ km/s}$ , respectively, based on Sakai et al. (2009) and Vastel et al. (2015), respectively.

calculations, we considered three possible proton donors:  $\text{H}_3^+$ ,  $\text{H}_3\text{O}^+$ , and  $\text{HCO}^+$ , as well as the formation of the two isomers of protonated ketene,  $\text{CH}_3\text{CO}^+$  and  $\text{CH}_2\text{COH}^+$ . Figure C.1 depicts the PES along the reaction coordinate for the protonation of ketene and the relative energies for all the stationary points when ketene reacts with  $\text{H}_3^+$ ,  $\text{H}_3\text{O}^+$ , or  $\text{HCO}^+$ . For each reaction, the two reactants, ketene and the proton donor, that separated from each other were assumed to be the energy zero. The protonation

**Table B.1.** Rotational constants and electric dipole moments of potential candidates.

| Species <sup>(a)</sup>           | $\Delta E/\text{kJ/mol}^{(b)}$ | A, B, C/MHz                    | $D_J, D_{JK}/\text{kHz}$ | $\mu_a, \mu_b, \mu_c/\text{D}$ |
|----------------------------------|--------------------------------|--------------------------------|--------------------------|--------------------------------|
| H <sub>3</sub> CCO <sup>+</sup>  | 0.0                            | 154355.3<br>9107.2<br>9107.2   | 3.9<br>178.7             | 2.5<br>0.0<br>0.0              |
| H <sub>2</sub> COH <sup>+</sup>  | 178.0                          | 201325.3<br>9411.2<br>9222.3   | 2.7<br>341.6             | 1.6<br>0.1<br>0.0              |
| H <sub>3</sub> CNCH <sup>+</sup> | 0.0                            | 155571.2<br>9090.7<br>9090.7   | 3.8<br>160.6             | 1.9<br>0.0<br>0.0              |
| H <sub>2</sub> CCCH <sup>+</sup> | 0.0                            | 285625.5<br>9673.5<br>9356.6   | 2.6<br>457.3             | 0.5<br>0.0<br>0.0              |
| H <sub>2</sub> CCN <sup>+</sup>  | 0.0                            | 280905.8<br>10338.2<br>9971.2  | 3.5<br>492.0             | 5.0<br>0.0<br>0.0              |
| H <sub>2</sub> CNC <sup>+</sup>  | 5.9                            | 277331.4<br>11582.1<br>11117.8 | 4.00<br>685.4            | 3.7<br>0.0<br>0.0              |
| HNCCH <sup>+</sup>               | 102.5                          | 595150.6<br>10359.3<br>10182.1 | 2.7<br>1285.8            | 1.5<br>1.9<br>0.0              |
| H <sub>2</sub> NCC <sup>+</sup>  | 176.4                          | 328396.0<br>10180.7<br>9874.5  | 3.6<br>593.3             | 4.6<br>0.0<br>0.0              |
| HCNCH <sup>+</sup>               | 196.2                          | 11120.9                        | 2.9                      | 0.0                            |
| H <sub>2</sub> NCO <sup>+</sup>  | 0.0                            | 324210.9<br>10295.5<br>9978.6  | 2.9<br>380.4             | 3.8<br>0.0<br>0.0              |
| HNCOH <sup>+</sup>               | 70.4                           | 723374.4<br>10034.0<br>9896.7  | 2.8<br>1255.3            | 1.3<br>1.7<br>0.0              |
| HCNOH <sup>+</sup>               | 285.4                          | 625942.1<br>10400.0<br>10230.0 | 3.8<br>1859.1            | 2.4<br>1.6<br>0.0              |
| H <sub>2</sub> CNO <sup>+</sup>  | 333.8                          | 268002.3<br>11140.1<br>10695.5 | 3.6<br>461.1             | 2.9<br>0.0<br>0.0              |
| H <sub>2</sub> CON <sup>+</sup>  | 613.2                          | 259994.7<br>11321.2<br>10848.8 | 4.6<br>484.7             | 2.3<br>0.0<br>0.0              |

**Notes.** <sup>(a)</sup> Calculations at the CCSD/cc-pVTZ level of theory. <sup>(b)</sup> The energy taken as reference is the lowest energy species within the same isomer family.

of ketene in the CH<sub>2</sub> in the three cases is exothermic, and it proceeds without any transition state (TS) to form CH<sub>3</sub>CO<sup>+</sup>. This formation is more favourable in the case of H<sub>3</sub><sup>+</sup>. On the other hand, the formation of CH<sub>2</sub>COH<sup>+</sup> is exothermic in the cases of H<sub>3</sub><sup>+</sup> and HCO<sup>+</sup>, but endothermic in the case of H<sub>3</sub>O<sup>+</sup>. The less stable isomer, CH<sub>2</sub>COH<sup>+</sup>, can interconvert through a hydrogen migration to CH<sub>3</sub>CO<sup>+</sup>, which has a TS barrier height of 210.1 kJ/mol. As shown in Figure C.1, the TS for this interconversion lies over the energy of the reactants in the protonation of ketene with H<sub>3</sub>O<sup>+</sup> and HCO<sup>+</sup>. In contrast, this TS lies below the energy of the reactants when ketene reacts with H<sub>3</sub><sup>+</sup>.

#### Appendix D: CH<sub>3</sub>X species in TMC-1

As noted above, the intensity of the  $J=2-1$   $K=1$  line in TMC-1 is well below the expected value if the rotational temperature for the  $A$  and  $E$  species is the same. In order to check this point, we show in Fig. D.1 the rotational diagrams for the  $A$  and  $E$  species of CH<sub>3</sub>CO<sup>+</sup> using the observed line parameters given in Table 1. The observed intensities have been corrected for beam dilution and the beam efficiencies of the Yebes 40m and IRAM 30m telescopes. We assumed a uniform source of radius 40'' (Fossé et al. 2001). The derived rotational temperatures,  $T_{rot}(A)=4.4\pm 0.4$  K and  $T_{rot}(E)=5.0\pm 0.5$  K, are consistent with a common excitation through collisions with H<sub>2</sub>. The de-

**Table B.2.** Scaled theoretical values for the spectroscopic parameters of  $\text{CH}_3\text{CO}^+$ ,  $\text{CH}_2\text{COH}^+$ , and  $\text{CH}_3\text{NCH}^+$  (all in MHz).

| Parameter             | $\text{CH}_3\text{CN}$  |                   | $\text{CH}_3\text{CO}^+$  |                     |                   |
|-----------------------|-------------------------|-------------------|---------------------------|---------------------|-------------------|
|                       | Calc. <sup>a</sup>      | Exp. <sup>b</sup> | Calc. <sup>a</sup>        | Scaled <sup>c</sup> | Exp. <sup>d</sup> |
| $(A-B)\times 10^{-3}$ | 150.4                   | 148.900074(65)    | 145.0                     | 143.5               | -                 |
| $B$                   | 9191.5                  | 9198.899134(11)   | 9122.3                    | 9129.6              | 9134.4742(8)      |
| $D_J\times 10^3$      | 3.6                     | 3.807528(9)       | 3.7                       | 3.9                 | 4.014(13)         |
| $D_{JK}\times 10^3$   | 174.0                   | 177.40796(28)     | 181.0                     | 184.6               | 188.47(50)        |
| Parameter             | $\text{CH}_2\text{CNH}$ |                   | $\text{CH}_2\text{COH}^+$ |                     |                   |
|                       | Calc. <sup>a</sup>      | Exp. <sup>e</sup> | Calc. <sup>a</sup>        | Scaled <sup>f</sup> | Exp. <sup>d</sup> |
| $A$                   | 198393.1                | 201443.685(75)    | 198278.8                  | 201327.7            | -                 |
| $B$                   | 9666.3                  | 9663.168(2)       | 9411.8                    | 9408.7              | -                 |
| $C$                   | 9488.0                  | 9470.127(2)       | 9227.6                    | 9210.2              | 9134.4742(8)      |
| $D_J\times 10^3$      | 2.9                     | 2.980(2)          | 2.7                       | 2.8                 | 4.014(13)         |
| $D_{JK}\times 10^3$   | 244.4                   | 232.8(3)          | 397.7                     | 378.7               | 188.47(50)        |
| Parameter             | $\text{CH}_3\text{NC}$  |                   | $\text{CH}_3\text{NCH}^+$ |                     |                   |
|                       | Calc. <sup>a</sup>      | Exp. <sup>g</sup> | Calc. <sup>a</sup>        | Scaled <sup>h</sup> | Exp. <sup>d</sup> |
| $(A-B)\times 10^{-3}$ | 169.0                   | 167.36100(23)     | 164.5                     | 162.9               | -                 |
| $B$                   | 10049.0                 | 10052.88568(25)   | 9102.0                    | 9105.5              | 9134.4742(8)      |
| $D_J\times 10^3$      | 4.4                     | 4.69212(18)       | 3.8                       | 4.0                 | 4.014(13)         |
| $D_{JK}\times 10^3$   | 222.9                   | 227.5116(83)      | 168.2                     | 171.7               | 188.47(50)        |

**Notes.** <sup>(a)</sup> Rotational constants calculated at the CCSD(T)-F12b/aug-cc-pVQZ level of theory, and centrifugal distortion constants calculated at the MP2/aug-cc-pVQZ level of theory. <sup>(b)</sup> Müller et al. (2009). <sup>(c)</sup> Scaled by the ratio Exp/Calc. of the corresponding parameter for  $\text{CH}_3\text{CN}$  species. <sup>(d)</sup> This work. <sup>(e)</sup> Rodler et al. (1984). <sup>(f)</sup> Scaled by the ratio Exp/Calc. of the corresponding parameter for  $\text{CH}_2\text{CNH}$  species. <sup>(g)</sup> Plíva et al. (1995). <sup>(h)</sup> Scaled by the ratio Exp/Calc. of the corresponding parameter for  $\text{CH}_3\text{NC}$  species.

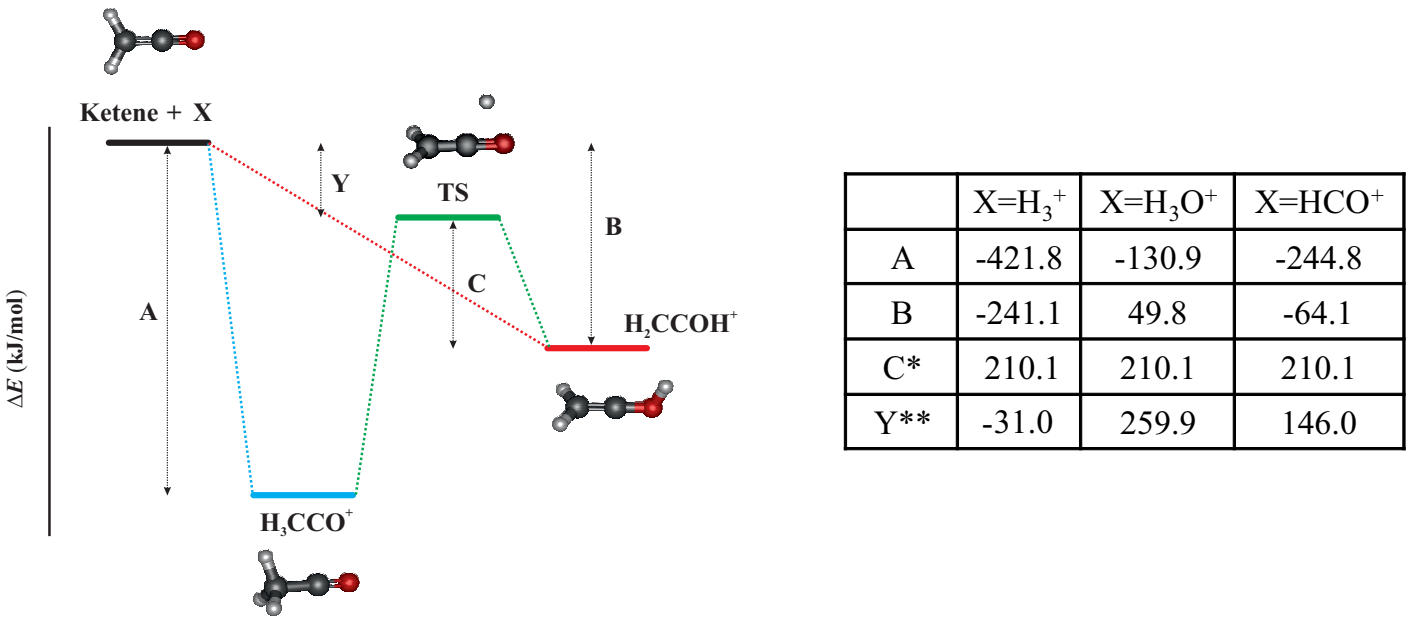

**Fig. C.1.** Energy diagram for the protonation of ketene. Total energies relative to those of the separated reactants, ketene and the proton donor X, are given in the enclosed table in  $\text{kJ mol}^{-1}$ . C\* is the TS energy for the interconversion between  $\text{CH}_2\text{COH}^+$  and  $\text{CH}_3\text{CO}^+$  isomers. Y\*\* is the energy difference between the reactants and the interconversion TS; a negative value indicates that the TS is submerged below the reactant energy, and a positive value implies that the TS lies above the reactant energy.

rived column densities are  $N(A\text{-CH}_3\text{CO}^+) = (2.2 \pm 0.2) \times 10^{11} \text{ cm}^{-2}$  and  $N(E\text{-CH}_3\text{CO}^+) = (9.7 \pm 0.9) \times 10^{10} \text{ cm}^{-2}$ . Hence, as discussed in Sect. 3.4, the  $A/E$  abundance ratio for  $\text{CH}_3\text{CO}^+$  has been modified through collisions with  $\text{H}^+$ ,  $\text{H}_3^+$ ,  $\text{HCO}^+$ , and  $\text{H}_3\text{O}^+$ . This is a similar effect to that found in cold molecular clouds for molecules having ortho and para symmetry species.

In order to check this peculiar result, we analysed all symmetric rotors having transitions within our line sur-

vey:  $\text{CH}_3\text{CCH}$ ,  $\text{CH}_3\text{C}_4\text{H}$ ,  $\text{CH}_3\text{CN}$ , and  $\text{CH}_3\text{NC}$ . The cation  $\text{CH}_3\text{CNH}^+$  has not been detected in TMC-1 (see Sect. 3.3). The symmetric top  $\text{CH}_3\text{C}_3\text{N}$  is discussed in Marcelino et al. (2020b). Figure D.2 shows the  $J=2-1$  transition for  $\text{CH}_3\text{CN}$ ,  $\text{CH}_3\text{CCH}$ ,  $\text{CH}_3\text{NC}$ , and  $\text{CH}_3\text{CO}^+$  (for this species, see also Fig. 1). The  $K=0$  and  $K=1$  lines of  $\text{CH}_3\text{CN}$  exhibit the typical hyperfine structure introduced by the quadrupole moment of the N nucleus. For all these additional molecules, we assumed a rotational tem-

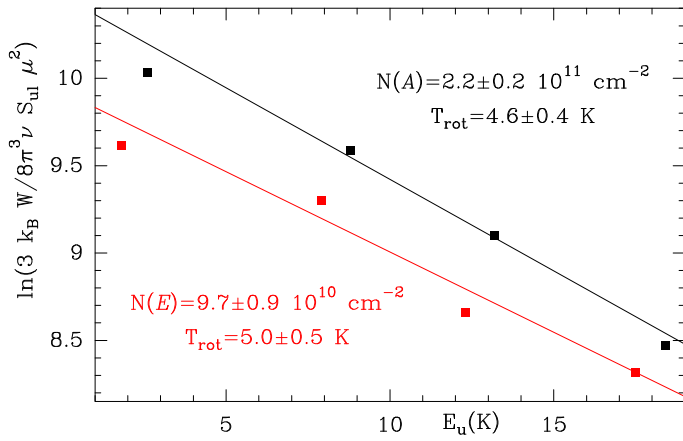

**Fig. D.1.** Rotational diagrams for the  $A$  (black line) and  $E$  (red line) symmetry species of  $\text{CH}_3\text{CO}^+$  in TMC-1.

perature of 10 K and a source radius of  $40''$  (Fossé et al. 2001), and we produced a synthetic spectrum that is compared to the observations. We found that the  $A/E$  abundance ratio is  $\approx 1$  for all species but  $\text{CH}_3\text{CO}^+$ . Adopting a lower rotational temperature has little effect on the derived  $A/E$  abundance ratio for these symmetric rotors.

### Appendix E: Observed and calculated frequencies of $\text{CH}_3\text{CO}^+$

The frequencies observed in space and in the laboratory were merged to obtain the recommended rotational and distortion constants. A total of 89 rotational transitions, ten in space (see Table 1) and 79 in the laboratory (see Table E.1), were fitted to the standard Hamiltonian of a symmetric rotor (Gordy & Cook 1984). For the lines observed in TMC-1 and other dark clouds, only  $B$ ,  $D_J$ , and  $D_{JK}$  can be obtained as only rotational transitions with  $K=0$  and 1 have been observed. The results are given in Table 2. For the 79 lines observed in the laboratory, the constants  $H_{JK}$  and  $H_{KJ}$  were included in the fit, and the results are given in Table 2. Finally, the merged fit to the astronomical and laboratory lines produces the recommended set of rotational constants given in the last column of Table 2. The observed and calculated frequencies, together with the observed minus calculated values for the merged fit, are given in Table E.1.

We used the rotational and distortion constants that resulted from the merged fit to the astronomical and laboratory lines (see Table 2) to produce frequency predictions, frequency uncertainties, line strengths, upper energy levels, and Einstein coefficients for all transitions involving levels with energies below 2000 K. They are given in Table E.2. The whole table is electronically available at the CDS. It should be noted that this table contains the transitions for the  $A$  and  $E$  species, and that the  $E$  lowest energy level,  $J_K=1_1$ , is 7.8 K above the  $0_0$  level of the  $A$  species.

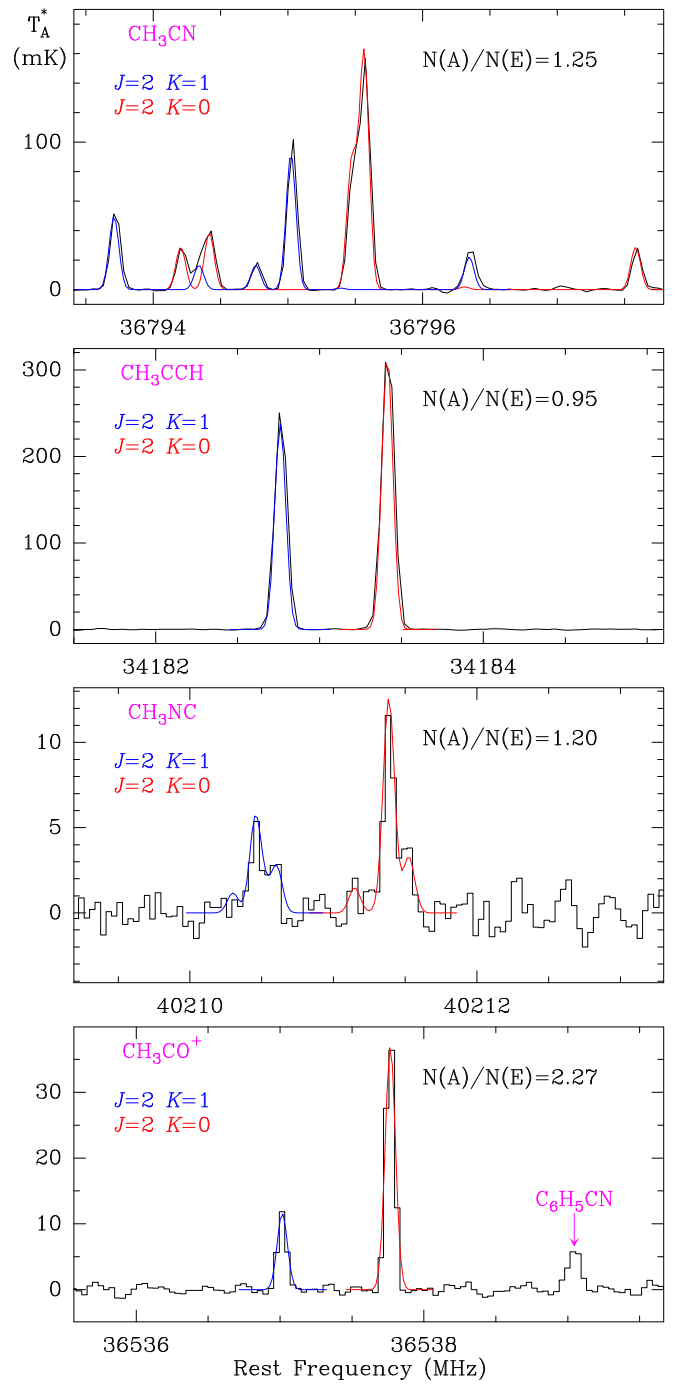

**Fig. D.2.** Observed lines in the transition  $J=2-1$   $K=0,1$  of different symmetric rotors in TMC-1. The colour lines represent the expected line profiles for the  $A$  species (red) and  $E$  species (blue). The abundance ratio between them in the model is indicated in each panel.

**Table E.1.** Observed and calculated frequencies (in MHz) for CH<sub>3</sub>CO<sup>+</sup>.

| $J_u$ | K | Freq. Obser. | (Unc) | Freq. Calc. | (Unc) | Obs-Calc |
|-------|---|--------------|-------|-------------|-------|----------|
| 2     | 0 | 36537.765    | 0.010 | 36537.761   | 0.001 | 0.004    |
| 2     | 1 | 36537.014    | 0.010 | 36537.010   | 0.001 | 0.004    |
| 4     | 0 | 73074.769    | 0.010 | 73074.755   | 0.002 | 0.014    |
| 4     | 1 | 73073.252    | 0.010 | 73073.253   | 0.002 | -0.001   |
| 5     | 0 | 91342.732    | 0.010 | 91342.725   | 0.003 | 0.007    |
| 5     | 1 | 91340.865    | 0.010 | 91340.848   | 0.003 | 0.017    |
| 6     | 0 | 109610.225   | 0.010 | 109610.215  | 0.003 | 0.010    |
| 6     | 1 | 109607.954   | 0.010 | 109607.963  | 0.003 | -0.009   |
| 7     | 0 | 127877.133   | 0.025 | 127877.131  | 0.004 | 0.002    |
| 7     | 1 | 127874.494   | 0.050 | 127874.504  | 0.004 | -0.010   |
| 10    | 3 | 182639.714   | 0.050 | 182639.724  | 0.011 | -0.010   |
| 10    | 2 | 182658.451   | 0.050 | 182658.469  | 0.006 | -0.018   |
| 10    | 1 | 182669.687   | 0.050 | 182669.719  | 0.005 | -0.032   |
| 10    | 0 | 182673.442   | 0.050 | 182673.470  | 0.005 | -0.028   |
| 11    | 3 | 200900.043   | 0.050 | 200900.014  | 0.012 | 0.029    |
| 11    | 2 | 200920.617   | 0.050 | 200920.630  | 0.007 | -0.013   |
| 11    | 1 | 200933.010   | 0.050 | 200933.002  | 0.006 | 0.008    |
| 11    | 0 | 200937.148   | 0.050 | 200937.127  | 0.006 | 0.021    |
| 12    | 3 | 219159.236   | 0.050 | 219159.253  | 0.013 | -0.017   |
| 12    | 2 | 219181.747   | 0.050 | 219181.737  | 0.008 | 0.010    |
| 12    | 1 | 219195.209   | 0.050 | 219195.232  | 0.006 | -0.023   |
| 12    | 0 | 219199.712   | 0.050 | 219199.731  | 0.006 | -0.019   |
| 13    | 3 | 237417.332   | 0.050 | 237417.345  | 0.014 | -0.013   |
| 13    | 2 | 237441.706   | 0.050 | 237441.696  | 0.008 | 0.010    |
| 13    | 1 | 237456.320   | 0.050 | 237456.311  | 0.007 | 0.009    |
| 13    | 0 | 237461.178   | 0.050 | 237461.184  | 0.007 | -0.006   |
| 14    | 3 | 255674.171   | 0.050 | 255674.193  | 0.015 | -0.022   |
| 14    | 2 | 255700.388   | 0.050 | 255700.410  | 0.009 | -0.022   |
| 14    | 1 | 255716.107   | 0.050 | 255716.145  | 0.007 | -0.038   |
| 14    | 0 | 255721.370   | 0.050 | 255721.391  | 0.007 | -0.021   |
| 16    | 3 | 292183.778   | 0.050 | 292183.777  | 0.017 | 0.001    |
| 16    | 2 | 292213.646   | 0.050 | 292213.722  | 0.010 | -0.075   |
| 16    | 1 | 292231.636   | 0.050 | 292231.694  | 0.008 | -0.058   |
| 16    | 0 | 292237.659   | 0.050 | 292237.685  | 0.008 | -0.026   |
| 17    | 3 | 310436.291   | 0.050 | 310436.322  | 0.019 | -0.031   |
| 17    | 2 | 310468.201   | 0.100 | 310468.127  | 0.011 | 0.074    |
| 17    | 1 | 310487.210   | 0.050 | 310487.216  | 0.009 | -0.006   |
| 17    | 0 | 310493.523   | 0.050 | 310493.580  | 0.009 | -0.057   |
| 18    | 3 | 328687.226   | 0.050 | 328687.241  | 0.020 | -0.015   |
| 18    | 2 | 328720.866   | 0.050 | 328720.905  | 0.012 | -0.039   |
| 18    | 1 | 328741.056   | 0.050 | 328741.110  | 0.010 | -0.054   |
| 18    | 0 | 328747.827   | 0.050 | 328747.846  | 0.010 | -0.019   |
| 21    | 6 | 383217.758   | 0.050 | 383217.721  | 0.096 | 0.037    |
| 21    | 5 | 383303.931   | 0.050 | 383303.862  | 0.064 | 0.069    |
| 21    | 4 | 383374.395   | 0.050 | 383374.396  | 0.041 | -0.001   |
| 21    | 3 | 383429.306   | 0.050 | 383429.289  | 0.025 | 0.017    |
| 21    | 2 | 383468.517   | 0.050 | 383468.517  | 0.015 | 0.000    |
| 21    | 1 | 383492.044   | 0.050 | 383492.060  | 0.012 | -0.016   |
| 21    | 0 | 383499.892   | 0.050 | 383499.910  | 0.012 | -0.018   |
| 22    | 6 | 401451.192   | 0.050 | 401451.205  | 0.103 | -0.013   |
| 22    | 5 | 401541.411   | 0.050 | 401541.408  | 0.069 | 0.003    |
| 22    | 4 | 401615.264   | 0.050 | 401615.268  | 0.044 | -0.004   |
| 22    | 3 | 401672.742   | 0.050 | 401672.750  | 0.027 | -0.008   |
| 22    | 2 | 401713.849   | 0.050 | 401713.827  | 0.017 | 0.022    |
| 22    | 1 | 401738.482   | 0.050 | 401738.481  | 0.014 | 0.001    |
| 22    | 0 | 401746.707   | 0.050 | 401746.700  | 0.014 | 0.007    |
| 23    | 6 | 419682.601   | 0.050 | 419682.598  | 0.111 | 0.003    |
| 23    | 5 | 419776.829   | 0.050 | 419776.858  | 0.074 | -0.029   |
| 23    | 4 | 419854.065   | 0.050 | 419854.039  | 0.048 | 0.026    |
| 23    | 3 | 419914.100   | 0.050 | 419914.106  | 0.029 | -0.006   |

**Table E.1.** continued.

| $J_u$ | K | Freq. Obser. | (Unc) | Freq. Calc. | (Unc) | Obs-Calc |
|-------|---|--------------|-------|-------------|-------|----------|
| 23    | 2 | 419957.037   | 0.050 | 419957.031  | 0.018 | 0.006    |
| 23    | 1 | 419982.794   | 0.050 | 419982.794  | 0.015 | 0.000    |
| 23    | 0 | 419991.387   | 0.050 | 419991.383  | 0.015 | 0.004    |
| 24    | 6 | 437911.779   | 0.050 | 437911.807  | 0.119 | -0.026   |
| 24    | 5 | 438010.092   | 0.050 | 438010.117  | 0.080 | -0.025   |
| 24    | 4 | 438090.613   | 0.050 | 438090.615  | 0.052 | -0.002   |
| 24    | 3 | 438153.261   | 0.050 | 438153.263  | 0.032 | -0.002   |
| 24    | 2 | 438198.039   | 0.050 | 438198.033  | 0.020 | 0.006    |
| 24    | 1 | 438224.913   | 0.050 | 438224.903  | 0.016 | 0.010    |
| 24    | 0 | 438233.877   | 0.050 | 438233.861  | 0.016 | 0.016    |
| 25    | 6 | 456138.764   | 0.150 | 456138.735  | 0.129 | 0.029    |
| 25    | 5 | 456240.963   | 0.150 | 456241.090  | 0.087 | -0.127   |
| 25    | 4 | 456324.889   | 0.050 | 456324.900  | 0.056 | -0.011   |
| 25    | 3 | 456390.167   | 0.050 | 456390.126  | 0.034 | 0.041    |
| 25    | 2 | 456436.758   | 0.050 | 456436.737  | 0.022 | 0.021    |
| 25    | 1 | 456464.703   | 0.050 | 456464.712  | 0.018 | -0.009   |
| 25    | 0 | 456474.048   | 0.050 | 456474.039  | 0.018 | 0.009    |
| 26    | 5 | 474469.660   | 0.050 | 474469.681  | 0.094 | -0.021   |
| 26    | 4 | 474556.835   | 0.050 | 474556.798  | 0.061 | 0.037    |
| 26    | 3 | 474624.604   | 0.050 | 474624.597  | 0.037 | 0.007    |
| 26    | 2 | 474673.034   | 0.050 | 474673.048  | 0.024 | -0.014   |
| 26    | 1 | 474702.158   | 0.050 | 474702.127  | 0.020 | 0.031    |
| 26    | 0 | 474711.811   | 0.050 | 474711.821  | 0.020 | -0.010   |
| 27    | 5 | 492695.931   | 0.150 | 492695.796  | 0.102 | 0.135    |
| 27    | 4 | 492786.129   | 0.150 | 492786.214  | 0.066 | -0.085   |
| 27    | 3 | 492856.584   | 0.050 | 492856.582  | 0.041 | 0.002    |
| 27    | 2 | 492906.862   | 0.050 | 492906.869  | 0.026 | -0.007   |
| 27    | 1 | 492937.060   | 0.050 | 492937.050  | 0.022 | 0.010    |
| 27    | 0 | 492947.117   | 0.050 | 492947.112  | 0.022 | 0.005    |

**Table E.2.** Frequency predictions for CH<sub>3</sub>CO<sup>+</sup> \*.

| $J_u^a$ | $K_u^a$ | $J_l^a$ | $K_l^a$ | $\nu(\text{MHz})^b$ | Unc(MHz) <sup>c</sup> | $E_{up}(\text{K})^d$ | $A_{ij}(\text{s}^{-1})^e$ | $S_{ij}^f$ | $g_u^g$ |
|---------|---------|---------|---------|---------------------|-----------------------|----------------------|---------------------------|------------|---------|
| 1       | 0       | 0       | 0       | 18268.92826         | 0.00039               | 0.9                  | $2.898 \times 10^{-07}$   | 1.0000     | 3       |
| 2       | 1       | 1       | 1       | 36537.00979         | 0.00072               | 9.5                  | $2.086 \times 10^{-06}$   | 1.5000     | 5       |
| 2       | 0       | 1       | 0       | 36537.76068         | 0.00079               | 2.6                  | $2.782 \times 10^{-06}$   | 2.0000     | 5       |
| 3       | 2       | 2       | 2       | 54801.89688         | 0.00115               | 32.8                 | $5.587 \times 10^{-06}$   | 1.6667     | 7       |
| 3       | 1       | 2       | 1       | 54805.27517         | 0.00107               | 12.1                 | $8.941 \times 10^{-06}$   | 2.6667     | 7       |
| 3       | 0       | 2       | 0       | 54806.40143         | 0.00117               | 5.3                  | $1.006 \times 10^{-05}$   | 3.0000     | 7       |
| 4       | 3       | 3       | 3       | 73061.24457         | 0.00265               | 70.7                 | $1.081 \times 10^{-05}$   | 3.5000     | 18      |
| 4       | 2       | 3       | 2       | 73068.74904         | 0.00151               | 36.3                 | $1.854 \times 10^{-05}$   | 3.0000     | 9       |
| 4       | 1       | 3       | 1       | 73073.25310         | 0.00141               | 15.7                 | $2.318 \times 10^{-05}$   | 3.7500     | 9       |
| 4       | 0       | 3       | 0       | 73074.75469         | 0.00154               | 8.8                  | $2.473 \times 10^{-05}$   | 4.0000     | 9       |
| 5       | 4       | 4       | 4       | 91312.71293         | 0.00563               | 123.3                | $1.776 \times 10^{-05}$   | 1.8000     | 11      |
| 5       | 3       | 4       | 3       | 91325.83851         | 0.00326               | 75.1                 | $3.159 \times 10^{-05}$   | 6.4000     | 22      |
| 5       | 2       | 4       | 2       | 91335.21824         | 0.00186               | 40.7                 | $4.148 \times 10^{-05}$   | 4.2000     | 11      |
| 5       | 1       | 4       | 1       | 91340.84780         | 0.00173               | 20.0                 | $4.741 \times 10^{-05}$   | 4.8000     | 11      |
| 5       | 0       | 4       | 0       | 91342.72461         | 0.00189               | 13.2                 | $4.939 \times 10^{-05}$   | 5.0000     | 11      |
| 6       | 5       | 5       | 5       | 109553.96919        | 0.01021               | 190.5                | $2.644 \times 10^{-05}$   | 1.8333     | 13      |
| 6       | 4       | 5       | 4       | 109574.20539        | 0.00662               | 128.6                | $4.810 \times 10^{-05}$   | 3.3333     | 13      |
| 6       | 3       | 5       | 3       | 109589.95432        | 0.00384               | 80.4                 | $6.496 \times 10^{-05}$   | 9.0000     | 26      |
| 6       | 2       | 5       | 2       | 109601.20873        | 0.00219               | 46.0                 | $7.701 \times 10^{-05}$   | 5.3333     | 13      |
| 6       | 1       | 5       | 1       | 109607.96344        | 0.00203               | 25.3                 | $8.425 \times 10^{-05}$   | 5.8333     | 13      |
| 6       | 0       | 5       | 0       | 109610.21536        | 0.00223               | 18.4                 | $8.666 \times 10^{-05}$   | 6.0000     | 13      |
| 7       | 6       | 6       | 6       | 127782.68995        | 0.01698               | 272.3                | $3.683 \times 10^{-05}$   | 3.7143     | 30      |
| 7       | 5       | 6       | 5       | 127811.51930        | 0.01162               | 196.6                | $6.805 \times 10^{-05}$   | 3.4286     | 15      |
| 7       | 4       | 6       | 4       | 127835.12506        | 0.00755               | 134.7                | $9.361 \times 10^{-05}$   | 4.7143     | 15      |
| 7       | 3       | 6       | 3       | 127853.49637        | 0.00439               | 86.5                 | $1.135 \times 10^{-04}$   | 11.4286    | 30      |
| 7       | 2       | 6       | 2       | 127866.62477        | 0.00249               | 52.1                 | $1.278 \times 10^{-04}$   | 6.4286     | 15      |
| 7       | 1       | 6       | 1       | 127874.50422        | 0.00232               | 31.4                 | $1.363 \times 10^{-04}$   | 6.8571     | 15      |
| 7       | 0       | 6       | 0       | 127877.13111        | 0.00254               | 24.5                 | $1.391 \times 10^{-04}$   | 7.0000     | 15      |

**Notes.**

(\*) The entire table is electronically available at the CDS via anonymous ftp to cdsarc.u-strasbg.fr (130.79.128.5) or via <http://cdsweb.u-strasbg.fr/cgi-bin/qcat?J/A+A>

(a) Upper and lower  $J_K$  quantum numbers.

(b) Predicted frequency (in MHz).

(c) Uncertainty in the predicted frequency (in MHz).

(d) Energy (in K) of the upper energy level of the transition.

(e) Einstein coefficient of the transition (in s<sup>-1</sup>).

(f) Line strength.

(g) Degeneracy of the upper level. It is  $2J+1$  for all levels except for those with  $K=3 \times n$  ( $n=1,2,\dots$ ), for which  $g_u$  is  $2 \times (2J+1)$ .
